# Supplementary material
Source: PubMed Central journal article supplement (PMC10411319)
Supplement: NIHMS1662992-supplement-Panteli_20_Supplementary_Material.pdf [file NIHMS1662992-supplement-Panteli_20_Supplementary_Material.pdf]

## Supplemental material

### Mathematical solution of coupled mass-transfer, pharmacokinetic equations

The concentration of biomarker (ZsGreen) in a mouse is given by balances on ZsGreen concentration in the tumor,  $C_T$ , and the plasma,  $C_P$ .

$$V_T \frac{dC_T}{dt} = \dot{m}C_B V_T - kvV_T(C_T - C_P) \quad (3)$$

$$V_P \frac{dC_P}{dt} = kvV_T(C_T - C_P) - K_e C_P V_P \quad (4)$$

In these equations  $C_T$  and  $C_P$  are dependent on tumor volume,  $V_T$ , the rate of ZsGreen production per bacterium,  $\dot{m}$ , the tumor bacterial density,  $C_B$ , the plasma volume,  $V_P$ , the plasma clearance rate,  $K_e$ , and the composite mass transfer coefficient,  $kv$ . The initial conditions, when  $t = 0$ , are  $C_T(0) = C_P(0) = 0$ . These equations have simplified, non-dimensional forms.

$$\frac{d\bar{C}_T}{d\bar{t}} = \alpha - \bar{C}_T + \bar{C}_P \quad (S1)$$

$$\frac{d\bar{C}_P}{d\bar{t}} = \varphi \bar{C}_T - (\varphi + \beta) \bar{C}_P \quad (S2)$$

The concentrations were scaled by the minimum concentration detected in the plasma,  $C_0$ , so that  $\bar{C}_T = C_T/C_0$  and  $\bar{C}_P = C_P/C_0$ . The value of  $C_0$  does not affect the result and is arbitrary. Time was scaled by the rate of mass transfer,  $\bar{t} = kv t$ . The three new parameters are dimensionless biomarker production,  $\alpha$ , dimensionless tumor volume,  $\varphi$ , and dimensionless clearance,  $\beta$ .

$$\alpha = \frac{\dot{m}C_B}{C_0 kv} \quad \varphi = \frac{V_T}{V_P} \quad \beta = \frac{K_e}{kv} \quad (S3)$$

The two differential equations (Eqns. S1 and S2) were rearranged into a single inhomogeneous second-order equation that describes the concentration of ZsGreen in the plasma.

$$\frac{d^2\bar{C}_P}{d\bar{t}^2} + (\varphi + \beta + 1) \frac{d\bar{C}_P}{d\bar{t}} + \beta \bar{C}_P = \alpha \varphi \quad (S4)$$

This equation has an analytical solution.

$$\bar{C}_P = \frac{\alpha \varphi}{\beta \gamma} [(q - \gamma)e^{q\bar{t}} - qe^{(q-\gamma)\bar{t}} + \gamma] \quad (S5)$$

Three parameters were introduced to simplify the notation.

$$p = \varphi + \beta + 1 \quad q = (\gamma - p)/2 \quad \gamma = \sqrt{p^2 - 4\beta} \quad (S6)$$

The biomarker concentration in the tumor,  $\bar{C}_T$ , is dependent on  $\bar{C}_P$  and  $d\bar{C}_P/d\bar{t}$ .

$$\bar{C}_T = \frac{1}{\varphi} \left[ \frac{d\bar{C}_P}{d\bar{t}} + (\varphi + \beta)\bar{C}_P \right] \quad (\text{S7})$$

$$\frac{d\bar{C}_P}{d\bar{t}} = \frac{\alpha\varphi}{\gamma} \left[ e^{(q-\gamma)\bar{t}} - e^{q\bar{t}} \right] \quad (\text{S8})$$

### Number of bacteria in normal tissue

The number of bacteria in normal tissue was determined from the rate of ZsGreen production by tissue,  $P$ , and the plasma concentration of ZsGreen in control, tumor-free mice,  $C_{tf}$ . It was assumed that the production rate per bacterium was equal in tumors and normal tissue. The production of ZsGreen by tumors or tissues was linearly proportional to time (with constant  $A$ ) because  $C_T \gg C_P$ .

$$P = A \cdot t \quad (\text{S9})$$

The units of  $A$  are  $\text{fg} \cdot \text{CFU}^{-1} \cdot \text{h}^{-2}$ . Accumulation of ZsGreen in the plasma was the result of production in tissue minus systemic clearance.

$$V_P \frac{dC_P}{dt} = P N_B - K_e C_P V_p \quad (\text{S10})$$

Here  $N_B$  is the number of bacteria in normal tissue. This equation has a simplified, non-dimensional form.

$$\frac{d\bar{C}_P}{d\bar{t}} + \bar{C}_P = B \bar{t} \quad B = \frac{A N_B}{V_p C_0 K_e^2} \quad \bar{C}_P = C_P / C_{tf} \quad \bar{t} = K_e t \quad (\text{S11})$$

The analytical solution of this relation gives the plasma concentration as a function of time in mice without tumors.

$$\bar{C}_P = B (\bar{t} + e^{-\bar{t}} - 1) \quad (\text{S12})$$

At 72 hours,  $B$  was calculated based on  $\bar{C}_P = 1$  ( $C_P = C_{tf}$ ). Using a constant value for  $A$ ,  $N_B$  was determined from  $B$ .

### Mouse weight as a function of time

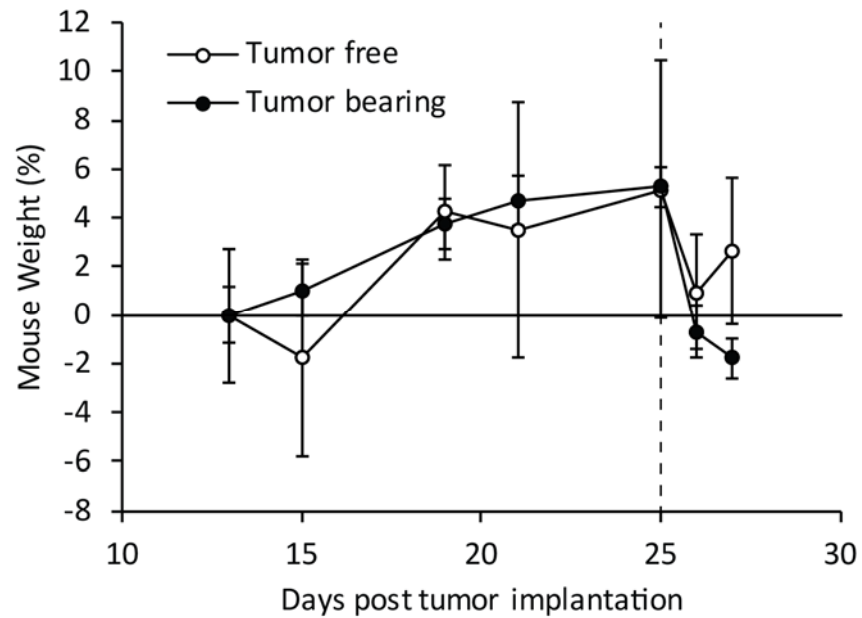

**Figure S1. Mouse weight after injection of fluorophore-releasing bacteria.** Weights were measured over time after tumor implantation and after bacterial injection on day 25. Weights are represented as a percentage of the weight on day 13 (19.95 and 19.34 g for tumor-free and tumor-bearing mice, respectively).
